# Supplementary material for: Response Surface Optimization of Biophotocatalytic Degradation of Industrial Wastewater for Bioenergy Recovery
Source: MDPI journal article supplement (doi:10.3390/bioengineering9030095), 2022-02-26
Supplement: s1 [file s1]

# Response Surface Optimization of Biophotocatalytic Degradation of Industrial Wastewater for Bioenergy Recovery

Emmanuel Kweinor Tetteh and Sudesh Rathilal

Table S1. Modified RSM-BBD optimized conditions of the BP system.

| Number | Catalyst Load (g) | HRT (days) | Biogas (mL/d) | COD (%) | Color (%) | Turbidity (%) |
|--------|-------------------|------------|---------------|---------|-----------|---------------|
| 1      | 4                 | 16         | 267           | 97.571  | 97.857    | 98.574        |
| 2      | 4                 | 31         | 272.75        | 96.982  | 97.286    | 98.288        |
| 3      | 4                 | 1          | 278.75        | 94.732  | 95.286    | 97.288        |
| 4      | 4                 | 16.796     | 266.865       | 97.626  | 97.906    | 98.598        |
| 5      | 4                 | 27.905     | 270.131       | 97.384  | 97.661    | 98.475        |
| 6      | 4                 | 18.504     | 266.743       | 97.711  | 97.98     | 98.635        |
| 7      | 4                 | 14.443     | 267.406       | 97.436  | 97.736    | 98.513        |
| 8      | 4                 | 9.324      | 270.069       | 96.731  | 97.101    | 98.195        |
| 9      | 4                 | 10.059     | 269.561       | 96.857  | 97.215    | 98.252        |
| 10     | 4                 | 12.025     | 268.409       | 97.153  | 97.482    | 98.386        |
| 11     | 4                 | 25.345     | 268.527       | 97.607  | 97.87     | 98.58         |
| 12     | 4                 | 25.461     | 268.589       | 97.599  | 97.863    | 98.576        |
| 13     | 4                 | 15.147     | 267.199       | 97.502  | 97.795    | 98.543        |
| 14     | 4                 | 18.696     | 266.743       | 97.718  | 97.986    | 98.638        |
| 15     | 4                 | 17.438     | 266.793       | 97.664  | 97.939    | 98.614        |
| 16     | 4                 | 20.922     | 266.958       | 97.756  | 98.016    | 98.653        |
| 17     | 4                 | 17.939     | 266.758       | 97.688  | 97.96     | 98.625        |
| 18     | 4                 | 23.4       | 267.65        | 97.709  | 97.968    | 98.629        |
| 19     | 4                 | 5.348      | 273.543       | 95.908  | 96.354    | 97.822        |
| 20     | 4                 | 23.201     | 267.576       | 97.716  | 97.975    | 98.633        |
| 21     | 4                 | 27.037     | 269.53        | 97.471  | 97.742    | 98.516        |
| 22     | 4                 | 25.644     | 268.688       | 97.586  | 97.85     | 98.57         |
| 23     | 4                 | 22.022     | 267.206       | 97.747  | 98.005    | 98.648        |
| 24     | 4                 | 5.641      | 273.245       | 95.977  | 96.417    | 97.853        |
| 25     | 4                 | 4.802      | 274.116       | 95.776  | 96.235    | 97.762        |
| 26     | 4                 | 3.521      | 275.551       | 95.449  | 95.938    | 97.614        |
| 27     | 4                 | 21.892     | 267.172       | 97.749  | 98.007    | 98.649        |
| 28     | 4                 | 11.262     | 268.821       | 97.045  | 97.384    | 98.337        |
| 29     | 4                 | 15.46      | 267.119       | 97.529  | 97.819    | 98.555        |
| 30     | 4                 | 16.993     | 266.84        | 97.638  | 97.916    | 98.603        |
| 31     | 4                 | 13.253     | 267.843       | 97.308  | 97.621    | 98.456        |
| 32     | 4                 | 19.802     | 266.802       | 97.746  | 98.01     | 98.65         |
| 33     | 4                 | 19.047     | 266.752       | 97.729  | 97.995    | 98.643        |
| 34     | 4                 | 19.988     | 266.821       | 97.749  | 98.012    | 98.651        |
| 35     | 4                 | 11.394     | 268.746       | 97.064  | 97.402    | 98.346        |

|    |     |        |         |        |        |        |
|----|-----|--------|---------|--------|--------|--------|
| 36 | 4   | 20.121 | 266.836 | 97.751 | 98.013 | 98.652 |
| 37 | 4   | 22.406 | 267.315 | 97.739 | 97.998 | 98.644 |
| 38 | 4   | 17.641 | 266.777 | 97.674 | 97.948 | 98.619 |
| 39 | 4   | 23.58  | 267.718 | 97.702 | 97.961 | 98.626 |
| 40 | 4   | 14.572 | 267.365 | 97.449 | 97.748 | 98.519 |
| 41 | 4   | 5.749  | 273.137 | 96.002 | 96.44  | 97.865 |
| 42 | 4   | 20.297 | 266.859 | 97.753 | 98.015 | 98.652 |
| 43 | 4   | 6.772  | 272.157 | 96.23  | 96.647 | 97.969 |
| 44 | 4   | 21.422 | 267.059 | 97.754 | 98.013 | 98.652 |
| 45 | 4   | 14.955 | 267.251 | 97.485 | 97.78  | 98.535 |
| 46 | 4   | 26.124 | 268.961 | 97.55  | 97.816 | 98.553 |
| 47 | 4   | 19.666 | 266.789 | 97.744 | 98.008 | 98.649 |
| 48 | 4   | 13.845 | 267.612 | 97.374 | 97.681 | 98.486 |
| 49 | 4   | 17.2   | 266.816 | 97.65  | 97.927 | 98.609 |
| 50 | 4   | 7.638  | 271.392 | 96.411 | 96.811 | 98.051 |
| 51 | 4   | 24.751 | 268.228 | 97.644 | 97.906 | 98.598 |
| 52 | 4   | 14.838 | 267.285 | 97.474 | 97.77  | 98.53  |
| 53 | 4   | 4.431  | 274.519 | 95.684 | 96.151 | 97.721 |
| 54 | 4   | 3.998  | 275.002 | 95.574 | 96.051 | 97.67  |
| 55 | 4   | 16.452 | 266.917 | 97.604 | 97.886 | 98.588 |
| 56 | 4   | 12.296 | 268.274 | 97.189 | 97.514 | 98.402 |
| 57 | 4   | 3.251  | 275.871 | 95.377 | 95.872 | 97.581 |
| 58 | 4   | 19.541 | 266.779 | 97.741 | 98.006 | 98.648 |
| 59 | 4   | 19.399 | 266.77  | 97.738 | 98.003 | 98.647 |
| 60 | 4   | 8.582  | 270.623 | 96.596 | 96.978 | 98.134 |
| 61 | 4   | 14.685 | 267.33  | 97.46  | 97.757 | 98.524 |
| 62 | 4   | 29.173 | 271.114 | 97.237 | 97.523 | 98.407 |
| 63 | 4   | 23.843 | 267.823 | 97.691 | 97.95  | 98.62  |
| 64 | 4   | 2.656  | 276.594 | 95.214 | 95.724 | 97.507 |
| 65 | 4   | 12.566 | 268.146 | 97.224 | 97.546 | 98.418 |
| 66 | 4   | 27.532 | 269.866 | 97.423 | 97.697 | 98.494 |
| 67 | 4   | 27.214 | 269.647 | 97.454 | 97.726 | 98.508 |
| 68 | 4   | 7.386  | 271.608 | 96.36  | 96.765 | 98.027 |
| 69 | 4   | 10.193 | 269.473 | 96.879 | 97.234 | 98.262 |
| 70 | 4   | 17.332 | 266.802 | 97.658 | 97.934 | 98.612 |
| 71 | 4   | 22.678 | 267.4   | 97.733 | 97.991 | 98.64  |
| 72 | 4   | 11.63  | 268.612 | 97.098 | 97.432 | 98.361 |
| 73 | 3.9 | 28.75  | 266.849 | 97.257 | 97.523 | 98.404 |
| 74 | 3.9 | 18.25  | 262.395 | 97.661 | 97.897 | 98.591 |
| 75 | 3.9 | 3.25   | 270.908 | 95.324 | 95.76  | 97.522 |
| 76 | 4.1 | 28.75  | 274.445 | 97.311 | 97.61  | 98.452 |
| 77 | 4.1 | 18.25  | 270.849 | 97.732 | 98.036 | 98.666 |
| 78 | 4.1 | 3.25   | 280.586 | 95.42  | 95.973 | 97.634 |
